# Supplementary material for: Sexual development dysgenesis in interspecific hybrids of Medaka fish
Source: Sci Rep. 2022 Mar 30;12:5408. doi: 10.1038/s41598-022-09314-6 (PMC8967909; doi:10.1038/s41598-022-09314-6)
Supplement: Supplementary file 2 — Supplementary Tables. [file 41598_2022_9314_MOESM2_ESM.xlsx]

## Sheet: S1
	Table S1: Commonly regulated genes in both H:Ylat and H:Ycur hybrid males in comparison to parental testis of both species.
	Upregulated genes ID	Human gene stable ID	Human gene name		Downregulated genes ID	Human gene stable ID	Human gene name
	ENSORLG00000015380				ENSORLG00000000021	ENSG00000237541	HLA-DQA2
	ENSORLG00000022610	ENSG00000187475	H1-6		ENSORLG00000002332	ENSG00000106714	CNTNAP3
	ENSORLG00000028642				ENSORLG00000003518	ENSG00000197888	UGT2B17
	ENSORLG00000029998	ENSG00000205476	CCDC85C		ENSORLG00000005985	ENSG00000174607	UGT8
					ENSORLG00000007185
					ENSORLG00000008190	ENSG00000099994	SUSD2
					ENSORLG00000009145
					ENSORLG00000009712	ENSG00000100170	SLC5A1
					ENSORLG00000009808	ENSG00000144815	NXPE3
					ENSORLG00000009897
					ENSORLG00000010020	ENSG00000186340	THBS2
					ENSORLG00000011416	ENSG00000241635	UGT1A1
					ENSORLG00000012219
					ENSORLG00000013784
					ENSORLG00000017347	ENSG00000174080	CTSF
					ENSORLG00000019376
					ENSORLG00000020391	ENSG00000134321	RSAD2
					ENSORLG00000020686	ENSG00000147642	SYBU
					ENSORLG00000021634	ENSG00000238942	SNORD2
					ENSORLG00000021939
					ENSORLG00000023116	ENSG00000164307	ERAP1
					ENSORLG00000023294	ENSG00000118096	IFT46
					ENSORLG00000023595
					ENSORLG00000023599
					ENSORLG00000023870
					ENSORLG00000024118	ENSG00000150459	SAP18
					ENSORLG00000024299
					ENSORLG00000024418	ENSG00000136490	LIMD2
					ENSORLG00000024498
					ENSORLG00000024731
					ENSORLG00000024842	ENSG00000182885	ADGRG3
					ENSORLG00000025336
					ENSORLG00000025550
					ENSORLG00000026194	ENSG00000163349	HIPK1
					ENSORLG00000026405	ENSG00000237541	HLA-DQA2
					ENSORLG00000027326
					ENSORLG00000027696
					ENSORLG00000027804	ENSG00000137959	IFI44L
					ENSORLG00000027909
					ENSORLG00000027958
					ENSORLG00000028597	ENSG00000113240	CLK4
					ENSORLG00000029386	ENSG00000170027	YWHAG
					ENSORLG00000029765
					ENSORLG00000030106
					ENSORLG00000030411	ENSG00000185745	IFIT1
					ENSORLG00000030438
					ENSORLG00000023166	ENSG00000117400	MPL

## Sheet: S2
	Table S2: Exclusively regulated genes in H:Ylat and in H:Ycur hybrid males in comparison to parental testis of both species.
	Upregulated genes ID XY H:Ylat male only	Human gene stable ID	Human gene name		Upregulated genes ID XY H:Ycur male only	Human gene stable ID	Human gene name		Downregulated genes ID XY H:Ylat male only	Human gene stable ID	Human gene name		Downregulated genes ID XY H:Ycur male only	Human gene stable ID	Human gene name
	ENSORLG00000012121	ENSG00000091138	SLC26A3		ENSORLG00000001350				ENSORLG00000002168	ENSG00000180209	MYLPF		ENSORLG00000000344	ENSG00000174944	P2RY14
	ENSORLG00000013835	ENSG00000174358	SLC6A19		ENSORLG00000001530	ENSG00000162881	OXER1		ENSORLG00000002432	ENSG00000168530	MYL1		ENSORLG00000000595
	ENSORLG00000016161	ENSG00000015592	STMN4		ENSORLG00000001758				ENSORLG00000002537				ENSORLG00000000706	ENSG00000175084	DES
	ENSORLG00000019025	ENSG00000198515	CNGA1		ENSORLG00000002111				ENSORLG00000002665				ENSORLG00000001238
	ENSORLG00000024112				ENSORLG00000002594				ENSORLG00000003644				ENSORLG00000001346
	ENSORLG00000025049				ENSORLG00000002868	ENSG00000151365	THRSP		ENSORLG00000004068	ENSG00000267060	PTGES3L		ENSORLG00000001681	ENSG00000184845	DRD1
	ENSORLG00000026633				ENSORLG00000003178				ENSORLG00000006939	ENSG00000224389	C4B		ENSORLG00000001768
	ENSORLG00000026726				ENSORLG00000005942				ENSORLG00000007755	ENSG00000107249	GLIS3		ENSORLG00000001800	ENSG00000137809	ITGA11
	ENSORLG00000028063	ENSG00000170324	FRMPD2		ENSORLG00000006426	ENSG00000141086	CTRL		ENSORLG00000007816				ENSORLG00000001892	ENSG00000134363	FST
					ENSORLG00000006967	ENSG00000139610	CELA1		ENSORLG00000009587				ENSORLG00000001908	ENSG00000187715	KBTBD12
					ENSORLG00000009903	ENSG00000188916	INSYN2A		ENSORLG00000009639	ENSG00000183091	NEB		ENSORLG00000001983	ENSG00000120500	ARR3
					ENSORLG00000010176	ENSG00000165272	AQP3		ENSORLG00000010628				ENSORLG00000002811	ENSG00000149256	TENM4
					ENSORLG00000012618				ENSORLG00000010794				ENSORLG00000003454	ENSG00000073734	ABCB11
					ENSORLG00000012646				ENSORLG00000011054	ENSG00000136160	EDNRB		ENSORLG00000003552	ENSG00000165621	OXGR1
					ENSORLG00000012688	ENSG00000147465	STAR		ENSORLG00000012002	ENSG00000125815	CST8		ENSORLG00000004067	ENSG00000168135	KCNJ4
					ENSORLG00000013603	ENSG00000122861	PLAU		ENSORLG00000012401	ENSG00000090512	FETUB		ENSORLG00000004161
					ENSORLG00000014439	ENSG00000170835	CEL		ENSORLG00000014696	ENSG00000120645	IQSEC3		ENSORLG00000004902
					ENSORLG00000014464	ENSG00000170835	CEL		ENSORLG00000015481				ENSORLG00000004907
					ENSORLG00000016330				ENSORLG00000015596	ENSG00000132677	RHBG		ENSORLG00000005003	ENSG00000145362	ANK2
					ENSORLG00000016427	ENSG00000149596	JPH2		ENSORLG00000015770	ENSG00000100024	UPB1		ENSORLG00000005595	ENSG00000154478	GPR26
					ENSORLG00000017246				ENSORLG00000016002				ENSORLG00000005686
					ENSORLG00000018517				ENSORLG00000016335	ENSG00000147003	CLTRN		ENSORLG00000006057	ENSG00000184160	ADRA2C
					ENSORLG00000019653				ENSORLG00000020962	ENSG00000276365	MIR145		ENSORLG00000006099
					ENSORLG00000019817				ENSORLG00000021115	ENSG00000284182	MIR143		ENSORLG00000006145	ENSG00000169836	TACR3
					ENSORLG00000021486				ENSORLG00000021598	ENSG00000206785	SNORA15B-2		ENSORLG00000006264
					ENSORLG00000022361				ENSORLG00000022753	ENSG00000164620	RELL2		ENSORLG00000006330	ENSG00000106089	STX1A
					ENSORLG00000022645				ENSORLG00000023076				ENSORLG00000006751	ENSG00000072071	ADGRL1
					ENSORLG00000022649				ENSORLG00000024908				ENSORLG00000006869
					ENSORLG00000023640				ENSORLG00000025367				ENSORLG00000007122	ENSG00000174469	CNTNAP2
					ENSORLG00000023653				ENSORLG00000025689	ENSG00000113240	CLK4		ENSORLG00000007651	ENSG00000099904	ZDHHC8
					ENSORLG00000024391				ENSORLG00000026775				ENSORLG00000007929
					ENSORLG00000024417				ENSORLG00000027269	ENSG00000155760	FZD7		ENSORLG00000008012	ENSG00000182674	KCNB2
					ENSORLG00000024623				ENSORLG00000027678				ENSORLG00000008055	ENSG00000131196	NFATC1
					ENSORLG00000024912				ENSORLG00000027784				ENSORLG00000008942
					ENSORLG00000024939	ENSG00000111671	SPSB2		ENSORLG00000027813	ENSG00000134775	FHOD3		ENSORLG00000009143
					ENSORLG00000025188	ENSG00000168928	CTRB2		ENSORLG00000027910	ENSG00000016402	IL20RA		ENSORLG00000009773
					ENSORLG00000025562				ENSORLG00000028244	ENSG00000163435	ELF3		ENSORLG00000009799	ENSG00000144815	NXPE3
					ENSORLG00000025852				ENSORLG00000030473	ENSG00000145362	ANK2		ENSORLG00000009939	ENSG00000126838	PZP
					ENSORLG00000025997	ENSG00000139610	CELA1						ENSORLG00000010279	ENSG00000076826	CAMSAP3
					ENSORLG00000026716	ENSG00000185527	PDE6G						ENSORLG00000010826	ENSG00000127152	BCL11B
					ENSORLG00000026960								ENSORLG00000011280
					ENSORLG00000026965								ENSORLG00000011317	ENSG00000101577	LPIN2
					ENSORLG00000027112								ENSORLG00000011500	ENSG00000183018	SPNS2
					ENSORLG00000027947								ENSORLG00000011677	ENSG00000185313	SCN10A
					ENSORLG00000028114								ENSORLG00000011860	ENSG00000112139	MDGA1
					ENSORLG00000028131								ENSORLG00000012083	ENSG00000177098	SCN4B
					ENSORLG00000028188								ENSORLG00000012125	ENSG00000116745	RPE65
					ENSORLG00000028472	ENSG00000186642	PDE2A						ENSORLG00000012139	ENSG00000164691	TAGAP
					ENSORLG00000028875	ENSG00000166947	EPB42						ENSORLG00000012356	ENSG00000261371	PECAM1
					ENSORLG00000028963								ENSORLG00000012387
					ENSORLG00000029021	ENSG00000110080	ST3GAL4						ENSORLG00000012613
					ENSORLG00000029973								ENSORLG00000013000	ENSG00000115363	EVA1A
					ENSORLG00000029989								ENSORLG00000013028	ENSG00000148841	ITPRIP
					ENSORLG00000030050	ENSG00000204442	FAM155A						ENSORLG00000013121
													ENSORLG00000013147	ENSG00000135144	DTX1
													ENSORLG00000013828	ENSG00000101082	SLA2
													ENSORLG00000013881	ENSG00000176678	FOXL1
													ENSORLG00000013891	ENSG00000167207	NOD2
													ENSORLG00000014101	ENSG00000203727	SAMD5
													ENSORLG00000015318	ENSG00000139329	LUM
													ENSORLG00000015489	ENSG00000121297	TSHZ3
													ENSORLG00000015741	ENSG00000135124	P2RX4
													ENSORLG00000015814	ENSG00000149582	TMEM25
													ENSORLG00000016229	ENSG00000197283	SYNGAP1
													ENSORLG00000016465	ENSG00000106689	LHX2
													ENSORLG00000016472	ENSG00000187068	C3orf70
													ENSORLG00000016517	ENSG00000105520	PLPPR2
													ENSORLG00000017083	ENSG00000215906	LACTBL1
													ENSORLG00000017187
													ENSORLG00000017305	ENSG00000198216	CACNA1E
													ENSORLG00000017723	ENSG00000095397	WHRN
													ENSORLG00000017768
													ENSORLG00000018160
													ENSORLG00000019420	ENSG00000248713	C4orf54
													ENSORLG00000019598	ENSG00000154645	CHODL
													ENSORLG00000019618	ENSG00000021461	CYP3A43
													ENSORLG00000020086	ENSG00000164111	ANXA5
													ENSORLG00000020139	ENSG00000196132	MYT1
													ENSORLG00000020273	ENSG00000115902	SLC1A4
													ENSORLG00000020871	ENSG00000183715	OPCML
													ENSORLG00000021468
													ENSORLG00000021522	ENSG00000271907	SNORA35B
													ENSORLG00000021530	ENSG00000201754	SNORD52
													ENSORLG00000021535
													ENSORLG00000021893
													ENSORLG00000021917
													ENSORLG00000022034	ENSG00000187258	NPSR1
													ENSORLG00000022067	ENSG00000133958	UNC79
													ENSORLG00000022208	ENSG00000126838	PZP
													ENSORLG00000022286	ENSG00000123384	LRP1
													ENSORLG00000022363
													ENSORLG00000023168	ENSG00000173585	CCR9
													ENSORLG00000023177	ENSG00000153012	LGI2
													ENSORLG00000023281
													ENSORLG00000023285	ENSG00000099260	PALMD
													ENSORLG00000023336	ENSG00000189132	FAM47B
													ENSORLG00000023520
													ENSORLG00000023661
													ENSORLG00000023900	ENSG00000137766	UNC13C
													ENSORLG00000024366
													ENSORLG00000024488
													ENSORLG00000024618	ENSG00000109943	CRTAM
													ENSORLG00000024918
													ENSORLG00000025081	ENSG00000126010	GRPR
													ENSORLG00000025721	ENSG00000277399	GPR179
													ENSORLG00000025796
													ENSORLG00000026643	ENSG00000127124	HIVEP3
													ENSORLG00000026749
													ENSORLG00000026770	ENSG00000081248	CACNA1S
													ENSORLG00000026836	ENSG00000243649	CFB
													ENSORLG00000027034	ENSG00000167964	RAB26
													ENSORLG00000027188	ENSG00000184144	CNTN2
													ENSORLG00000027243	ENSG00000189056	RELN
													ENSORLG00000027329	ENSG00000187908	DMBT1
													ENSORLG00000027865	ENSG00000012124	CD22
													ENSORLG00000027979
													ENSORLG00000028326
													ENSORLG00000028628
													ENSORLG00000028632
													ENSORLG00000028685
													ENSORLG00000029064	ENSG00000133800	LYVE1
													ENSORLG00000029213
													ENSORLG00000029503	ENSG00000166342	NETO1
													ENSORLG00000029542	ENSG00000162881	OXER1
													ENSORLG00000029762
													ENSORLG00000030019
													ENSORLG00000030203	ENSG00000004468	CD38
													ENSORLG00000030259
													ENSORLG00000030416
													ENSORLG00000030558

## Sheet: S3
	Table S3: Commonly regulated genes in all H:Ylat and H:Ycur hybrid females in comparison to parental ovaries of both species.
	Upregulated genes ID	Human gene stable ID	Human gene name		Downregulated genes ID	Human gene stable ID	Human gene name
	ENSORLG00000000050	ENSG00000153234	NR4A2		ENSORLG00000000375	ENSG00000087237	CETP
	ENSORLG00000000055	ENSG00000187122	SLIT1		ENSORLG00000000419
	ENSORLG00000000060	ENSG00000174672	BRSK2		ENSORLG00000000697
	ENSORLG00000000063	ENSG00000123191	ATP7B		ENSORLG00000001469
	ENSORLG00000000075	ENSG00000036448	MYOM2		ENSORLG00000002720
	ENSORLG00000000077	ENSG00000104369	JPH1		ENSORLG00000002928
	ENSORLG00000000079				ENSORLG00000002983
	ENSORLG00000000095	ENSG00000144369	FAM171B		ENSORLG00000003145	ENSG00000163131	CTSS
	ENSORLG00000000108	ENSG00000168280	KIF5C		ENSORLG00000004579
	ENSORLG00000000115				ENSORLG00000004629	ENSG00000143921	ABCG8
	ENSORLG00000000277	ENSG00000133069	TMCC2		ENSORLG00000005597	ENSG00000102901	CENPT
	ENSORLG00000000324				ENSORLG00000005900
	ENSORLG00000000356	ENSG00000091136	LAMB1		ENSORLG00000006604	ENSG00000149506	ZP1
	ENSORLG00000000447	ENSG00000105270	CLIP3		ENSORLG00000007453	ENSG00000140403	DNAJA4
	ENSORLG00000000492	ENSG00000072201	LNX1		ENSORLG00000007540
	ENSORLG00000000633	ENSG00000108813	DLX4		ENSORLG00000007561
	ENSORLG00000000636	ENSG00000148400	NOTCH1		ENSORLG00000008282
	ENSORLG00000000830	ENSG00000100033	PRODH		ENSORLG00000008622	ENSG00000130385	BMP15
	ENSORLG00000000922	ENSG00000088992	TESC		ENSORLG00000009490	ENSG00000151834	GABRA2
	ENSORLG00000001003	ENSG00000077935	SMC1B		ENSORLG00000009853
	ENSORLG00000001057	ENSG00000196218	RYR1		ENSORLG00000009867
	ENSORLG00000001160	ENSG00000143473	KCNH1		ENSORLG00000011661	ENSG00000101052	IFT52
	ENSORLG00000001208	ENSG00000156959	LHFPL4		ENSORLG00000011808	ENSG00000197142	ACSL5
	ENSORLG00000001267	ENSG00000113327	GABRG2		ENSORLG00000012249
	ENSORLG00000001357	ENSG00000185274	GALNT17		ENSORLG00000012273
	ENSORLG00000001483	ENSG00000130779	CLIP1		ENSORLG00000012357	ENSG00000121690	DEPDC7
	ENSORLG00000001530	ENSG00000162881	OXER1		ENSORLG00000012471
	ENSORLG00000001544	ENSG00000130787	HIP1R		ENSORLG00000012527
	ENSORLG00000001638	ENSG00000090975	PITPNM2		ENSORLG00000012623
	ENSORLG00000001644	ENSG00000177380	PPFIA3		ENSORLG00000013462
	ENSORLG00000001689	ENSG00000160460	SPTBN4		ENSORLG00000013630
	ENSORLG00000001731	ENSG00000152763	DNAI4		ENSORLG00000013643
	ENSORLG00000001756	ENSG00000171246	NPTX1		ENSORLG00000013657	ENSG00000134057	CCNB1
	ENSORLG00000001833	ENSG00000138668	HNRNPD		ENSORLG00000013975
	ENSORLG00000001868	ENSG00000107890	ANKRD26		ENSORLG00000014031	ENSG00000205423	CNEP1R1
	ENSORLG00000001933	ENSG00000120498	TEX11		ENSORLG00000014899	ENSG00000135317	SNX14
	ENSORLG00000002061				ENSORLG00000015660
	ENSORLG00000002069				ENSORLG00000015991
	ENSORLG00000002354				ENSORLG00000016020	ENSG00000140093	SERPINA10
	ENSORLG00000002571	ENSG00000079841	RIMS1		ENSORLG00000016580	ENSG00000205832	C16orf96
	ENSORLG00000002674				ENSORLG00000017484
	ENSORLG00000002810	ENSG00000213923	CSNK1E		ENSORLG00000017882
	ENSORLG00000002909	ENSG00000083307	GRHL2		ENSORLG00000018175
	ENSORLG00000003068	ENSG00000180138	CSNK1A1L		ENSORLG00000018937
	ENSORLG00000003230	ENSG00000145708	CRHBP		ENSORLG00000019292
	ENSORLG00000003263	ENSG00000165694	FRMD7		ENSORLG00000019376
	ENSORLG00000003411				ENSORLG00000019595	ENSG00000116996	ZP4
	ENSORLG00000003449				ENSORLG00000019674	ENSG00000189299	FOXR2
	ENSORLG00000003474	ENSG00000078618	NRDC		ENSORLG00000019945
	ENSORLG00000003513	ENSG00000185513	L3MBTL1		ENSORLG00000020369
	ENSORLG00000003539				ENSORLG00000020686	ENSG00000147642	SYBU
	ENSORLG00000003542	ENSG00000039139	DNAH5		ENSORLG00000020809	ENSG00000185467	KPNA7
	ENSORLG00000003547	ENSG00000239474	KLHL41		ENSORLG00000021299
	ENSORLG00000003563	ENSG00000185352	HS6ST3		ENSORLG00000022170	ENSG00000119655	NPC2
	ENSORLG00000003775	ENSG00000004838	ZMYND10		ENSORLG00000022208	ENSG00000126838	PZP
	ENSORLG00000003886				ENSORLG00000023003	ENSG00000089820	ARHGAP4
	ENSORLG00000003916	ENSG00000155980	KIF5A		ENSORLG00000023093
	ENSORLG00000003978				ENSORLG00000023238	ENSG00000100628	ASB2
	ENSORLG00000004069				ENSORLG00000023547	ENSG00000198842	STYXL2
	ENSORLG00000004115	ENSG00000185053	SGCZ		ENSORLG00000023557
	ENSORLG00000004121				ENSORLG00000023716	ENSG00000140093	SERPINA10
	ENSORLG00000004270	ENSG00000184408	KCND2		ENSORLG00000023779
	ENSORLG00000004371				ENSORLG00000023822	ENSG00000264364	DYNLL2
	ENSORLG00000004398	ENSG00000171044	XKR6		ENSORLG00000024118	ENSG00000150459	SAP18
	ENSORLG00000004402	ENSG00000078900	TP73		ENSORLG00000024500
	ENSORLG00000004516	ENSG00000158560	DYNC1I1		ENSORLG00000024833	ENSG00000131067	GGT7
	ENSORLG00000004606	ENSG00000178235	SLITRK1		ENSORLG00000024858
	ENSORLG00000004669	ENSG00000048342	CC2D2A		ENSORLG00000025635	ENSG00000166535	A2ML1
	ENSORLG00000004933	ENSG00000067057	PFKP		ENSORLG00000026154
	ENSORLG00000005234	ENSG00000130559	CAMSAP1		ENSORLG00000026718
	ENSORLG00000005309	ENSG00000063438	AHRR		ENSORLG00000027584
	ENSORLG00000005379	ENSG00000196361	ELAVL3		ENSORLG00000027708
	ENSORLG00000005381				ENSORLG00000029687
	ENSORLG00000005403	ENSG00000159263	SIM2		ENSORLG00000030361	ENSG00000124588	NQO2
	ENSORLG00000005426	ENSG00000125249	RAP2A		ENSORLG00000030404
	ENSORLG00000005438
	ENSORLG00000005453	ENSG00000188290	HES4
	ENSORLG00000005463
	ENSORLG00000005527	ENSG00000132321	IQCA1
	ENSORLG00000005664	ENSG00000060718	COL11A1
	ENSORLG00000005766	ENSG00000213694	S1PR3
	ENSORLG00000005907	ENSG00000159374	M1AP
	ENSORLG00000005993
	ENSORLG00000006060
	ENSORLG00000006070	ENSG00000160471	COX6B2
	ENSORLG00000006081	ENSG00000109625	CPZ
	ENSORLG00000006147	ENSG00000139351	SYCP3
	ENSORLG00000006169
	ENSORLG00000006171	ENSG00000010295	IFFO1
	ENSORLG00000006341	ENSG00000181856	SLC2A4
	ENSORLG00000006346	ENSG00000137941	TTLL7
	ENSORLG00000006357	ENSG00000134824	FADS2
	ENSORLG00000006385	ENSG00000112041	TULP1
	ENSORLG00000006570	ENSG00000165655	ZNF503
	ENSORLG00000006593	ENSG00000082684	SEMA5B
	ENSORLG00000006684	ENSG00000174327	SLC16A13
	ENSORLG00000006726	ENSG00000106351	AGFG2
	ENSORLG00000006753
	ENSORLG00000006852	ENSG00000236104	ZBTB22
	ENSORLG00000006856
	ENSORLG00000006900	ENSG00000164889	SLC4A2
	ENSORLG00000007030	ENSG00000084112	SSH1
	ENSORLG00000007039
	ENSORLG00000007050	ENSG00000028277	POU2F2
	ENSORLG00000007107	ENSG00000170004	CHD3
	ENSORLG00000007135	ENSG00000133055	MYBPH
	ENSORLG00000007145	ENSG00000187608	ISG15
	ENSORLG00000007222	ENSG00000100814	CCNB1IP1
	ENSORLG00000007412	ENSG00000151615	POU4F2
	ENSORLG00000007655	ENSG00000169884	WNT10B
	ENSORLG00000007662	ENSG00000138131	LOXL4
	ENSORLG00000007770	ENSG00000166342	NETO1
	ENSORLG00000007836
	ENSORLG00000007894	ENSG00000128242	GAL3ST1
	ENSORLG00000008092
	ENSORLG00000008419	ENSG00000178460	MCMDC2
	ENSORLG00000008562	ENSG00000089094	KDM2B
	ENSORLG00000008740	ENSG00000167971	CASKIN1
	ENSORLG00000008820	ENSG00000127220	ABHD8
	ENSORLG00000008967	ENSG00000177103	DSCAML1
	ENSORLG00000008990	ENSG00000175970	UNC119B
	ENSORLG00000009000
	ENSORLG00000009070
	ENSORLG00000009144	ENSG00000204410	MSH5
	ENSORLG00000009243
	ENSORLG00000009297	ENSG00000121053	EPX
	ENSORLG00000009335	ENSG00000188425	NANOS2
	ENSORLG00000009530
	ENSORLG00000009552
	ENSORLG00000009575	ENSG00000125869	LAMP5
	ENSORLG00000009617	ENSG00000139351	SYCP3
	ENSORLG00000009642
	ENSORLG00000009970
	ENSORLG00000009983	ENSG00000065989	PDE4A
	ENSORLG00000010055	ENSG00000174963	ZIC4
	ENSORLG00000010153	ENSG00000091129	NRCAM
	ENSORLG00000010169
	ENSORLG00000010490	ENSG00000166348	USP54
	ENSORLG00000010606	ENSG00000198719	DLL1
	ENSORLG00000010615	ENSG00000176444	CLK2
	ENSORLG00000010676	ENSG00000128309	MPST
	ENSORLG00000010708	ENSG00000182324	KCNJ14
	ENSORLG00000010846	ENSG00000139998	RAB15
	ENSORLG00000010911	ENSG00000169062	UPF3A
	ENSORLG00000010992	ENSG00000185070	FLRT2
	ENSORLG00000010994	ENSG00000196169	KIF19
	ENSORLG00000011019	ENSG00000141837	CACNA1A
	ENSORLG00000011107
	ENSORLG00000011114	ENSG00000111783	RFX4
	ENSORLG00000011158	ENSG00000162510	MATN1
	ENSORLG00000011200	ENSG00000115593	SMYD1
	ENSORLG00000011262	ENSG00000164458	TBXT
	ENSORLG00000011353	ENSG00000070182	SPTB
	ENSORLG00000011524
	ENSORLG00000011543	ENSG00000162814	SPATA17
	ENSORLG00000011575	ENSG00000172667	ZMAT3
	ENSORLG00000011708	ENSG00000065054	SLC9A3R2
	ENSORLG00000011728	ENSG00000103024	NME3
	ENSORLG00000011771	ENSG00000153820	SPHKAP
	ENSORLG00000011783	ENSG00000033100	CHPF2
	ENSORLG00000011851	ENSG00000215474	SKOR2
	ENSORLG00000012122
	ENSORLG00000012171	ENSG00000120907	ADRA1A
	ENSORLG00000012289	ENSG00000175183	CSRP2
	ENSORLG00000012301	ENSG00000165891	E2F7
	ENSORLG00000012384	ENSG00000040933	INPP4A
	ENSORLG00000012712	ENSG00000213928	IRF9
	ENSORLG00000012718	ENSG00000150995	ITPR1
	ENSORLG00000012783
	ENSORLG00000012932	ENSG00000169856	ONECUT1
	ENSORLG00000012938	ENSG00000100433	KCNK10
	ENSORLG00000013001	ENSG00000198794	SCAMP5
	ENSORLG00000013056	ENSG00000116183	PAPPA2
	ENSORLG00000013172
	ENSORLG00000013182
	ENSORLG00000013233	ENSG00000169181	GSG1L
	ENSORLG00000013375	ENSG00000050767	COL23A1
	ENSORLG00000013379
	ENSORLG00000013421	ENSG00000157350	ST3GAL2
	ENSORLG00000013422	ENSG00000118520	ARG1
	ENSORLG00000013593	ENSG00000102924	CBLN1
	ENSORLG00000013613
	ENSORLG00000013618
	ENSORLG00000013697	ENSG00000159387	IRX6
	ENSORLG00000013699	ENSG00000164638	SLC29A4
	ENSORLG00000013965	ENSG00000165731	RET
	ENSORLG00000014098	ENSG00000141933	TPGS1
	ENSORLG00000014652
	ENSORLG00000014708	ENSG00000185668	POU3F1
	ENSORLG00000014768	ENSG00000183186	C2CD4C
	ENSORLG00000014771	ENSG00000109927	TECTA
	ENSORLG00000014772
	ENSORLG00000014825	ENSG00000188176	SMTNL2
	ENSORLG00000014866	ENSG00000013583	HEBP1
	ENSORLG00000014951	ENSG00000206530	CFAP44
	ENSORLG00000014966
	ENSORLG00000015009	ENSG00000167658	EEF2
	ENSORLG00000015091	ENSG00000171208	NETO2
	ENSORLG00000015292	ENSG00000166908	PIP4K2C
	ENSORLG00000015420
	ENSORLG00000015432	ENSG00000144485	HES6
	ENSORLG00000015563	ENSG00000115665	SLC5A7
	ENSORLG00000015661
	ENSORLG00000015746
	ENSORLG00000015748	ENSG00000144191	CNGA3
	ENSORLG00000015791	ENSG00000180834	MAP6D1
	ENSORLG00000015848	ENSG00000274386	TMEM269
	ENSORLG00000015960	ENSG00000163032	VSNL1
	ENSORLG00000016142	ENSG00000132623	ANKEF1
	ENSORLG00000016465	ENSG00000106689	LHX2
	ENSORLG00000016537	ENSG00000118514	ALDH8A1
	ENSORLG00000016618	ENSG00000006468	ETV1
	ENSORLG00000016671	ENSG00000126895	AVPR2
	ENSORLG00000016697	ENSG00000067829	IDH3G
	ENSORLG00000016707	ENSG00000169330	MINAR1
	ENSORLG00000016741
	ENSORLG00000017033	ENSG00000198648	STK39
	ENSORLG00000017089	ENSG00000061455	PRDM6
	ENSORLG00000017097	ENSG00000133216	EPHB2
	ENSORLG00000017190	ENSG00000111642	CHD4
	ENSORLG00000017234	ENSG00000196935	SRGAP1
	ENSORLG00000017235	ENSG00000141526	SLC16A3
	ENSORLG00000017252	ENSG00000204335	SP5
	ENSORLG00000017412	ENSG00000125813	PAX1
	ENSORLG00000017607
	ENSORLG00000017647	ENSG00000187239	FNBP1
	ENSORLG00000017657	ENSG00000157851	DPYSL5
	ENSORLG00000017688	ENSG00000120256	LRP11
	ENSORLG00000017848	ENSG00000101608	MYL12A
	ENSORLG00000017883	ENSG00000079101	CLUL1
	ENSORLG00000017892	ENSG00000111886	GABRR2
	ENSORLG00000017919	ENSG00000133740	E2F5
	ENSORLG00000017995
	ENSORLG00000018001	ENSG00000125861	GFRA4
	ENSORLG00000018113	ENSG00000226321	CROCC2
	ENSORLG00000018121	ENSG00000144407	PTH2R
	ENSORLG00000018151	ENSG00000143512	HHIPL2
	ENSORLG00000018195
	ENSORLG00000018603	ENSG00000143515	ATP8B2
	ENSORLG00000018913	ENSG00000073969	NSF
	ENSORLG00000018969	ENSG00000145863	GABRA6
	ENSORLG00000018987	ENSG00000145864	GABRB2
	ENSORLG00000019017
	ENSORLG00000019018	ENSG00000163623	NKX6-1
	ENSORLG00000019420	ENSG00000248713	C4orf54
	ENSORLG00000019653	ENSG00000118733	OLFM3
	ENSORLG00000019791	ENSG00000180613	GSX2
	ENSORLG00000019992	ENSG00000080493	SLC4A4
	ENSORLG00000020139	ENSG00000196132	MYT1
	ENSORLG00000020342	ENSG00000120251	GRIA2
	ENSORLG00000020537
	ENSORLG00000020672	ENSG00000152670	DDX4
	ENSORLG00000020677	ENSG00000160207	HSF2BP
	ENSORLG00000020679	ENSG00000180720	CHRM4
	ENSORLG00000020806	ENSG00000078579	FGF20
	ENSORLG00000020880	ENSG00000121905	HPCA
	ENSORLG00000021486
	ENSORLG00000021821	ENSG00000048540	LMO3
	ENSORLG00000021828
	ENSORLG00000021850	ENSG00000126733	DACH2
	ENSORLG00000021982	ENSG00000130787	HIP1R
	ENSORLG00000022056
	ENSORLG00000022327	ENSG00000125814	NAPB
	ENSORLG00000022425	ENSG00000183914	DNAH2
	ENSORLG00000022495	ENSG00000169906	S100G
	ENSORLG00000022497
	ENSORLG00000022513	ENSG00000100918	REC8
	ENSORLG00000022521	ENSG00000130338	TULP4
	ENSORLG00000022603
	ENSORLG00000022620	ENSG00000135638	EMX1
	ENSORLG00000022635
	ENSORLG00000022673	ENSG00000123080	CDKN2C
	ENSORLG00000022823	ENSG00000174358	SLC6A19
	ENSORLG00000022824	ENSG00000130590	SAMD10
	ENSORLG00000022989
	ENSORLG00000023060	ENSG00000151612	ZNF827
	ENSORLG00000023061	ENSG00000188730	VWC2
	ENSORLG00000023084
	ENSORLG00000023248
	ENSORLG00000023286
	ENSORLG00000023360	ENSG00000180354	MTURN
	ENSORLG00000023387	ENSG00000157601	MX1
	ENSORLG00000023437	ENSG00000164794	KCNV1
	ENSORLG00000023524
	ENSORLG00000023681
	ENSORLG00000023692	ENSG00000107984	DKK1
	ENSORLG00000023821	ENSG00000165804	ZNF219
	ENSORLG00000023878
	ENSORLG00000023895	ENSG00000261787	TCF24
	ENSORLG00000023942
	ENSORLG00000024081	ENSG00000162188	GNG3
	ENSORLG00000024097	ENSG00000141433	ADCYAP1
	ENSORLG00000024134
	ENSORLG00000024166	ENSG00000254726	MEX3A
	ENSORLG00000024283
	ENSORLG00000024416
	ENSORLG00000024515
	ENSORLG00000024628
	ENSORLG00000024659
	ENSORLG00000024677	ENSG00000132639	SNAP25
	ENSORLG00000024683	ENSG00000175567	UCP2
	ENSORLG00000024691
	ENSORLG00000024753
	ENSORLG00000024818
	ENSORLG00000024934	ENSG00000184811	TRARG1
	ENSORLG00000024956
	ENSORLG00000025052	ENSG00000143869	GDF7
	ENSORLG00000025195	ENSG00000160460	SPTBN4
	ENSORLG00000025236
	ENSORLG00000025239	ENSG00000181264	TLCD5
	ENSORLG00000025258	ENSG00000138131	LOXL4
	ENSORLG00000025288	ENSG00000127377	CRYGN
	ENSORLG00000025324	ENSG00000074621	SLC24A1
	ENSORLG00000025367
	ENSORLG00000025412
	ENSORLG00000025513	ENSG00000150627	WDR17
	ENSORLG00000025617	ENSG00000186318	BACE1
	ENSORLG00000025663	ENSG00000100767	PAPLN
	ENSORLG00000025850	ENSG00000163354	DCST2
	ENSORLG00000025851	ENSG00000166503	HDGFL3
	ENSORLG00000025879
	ENSORLG00000025889
	ENSORLG00000025894
	ENSORLG00000025981	ENSG00000204291	COL15A1
	ENSORLG00000025996
	ENSORLG00000026074
	ENSORLG00000026251	ENSG00000130997	POLN
	ENSORLG00000026254	ENSG00000182674	KCNB2
	ENSORLG00000026326	ENSG00000124159	MATN4
	ENSORLG00000026328
	ENSORLG00000026341
	ENSORLG00000026376	ENSG00000165238	WNK2
	ENSORLG00000026403	ENSG00000215612	HMX1
	ENSORLG00000026525	ENSG00000172915	NBEA
	ENSORLG00000026582	ENSG00000127837	AAMP
	ENSORLG00000026844	ENSG00000162669	HFM1
	ENSORLG00000026856	ENSG00000139410	SDSL
	ENSORLG00000026925	ENSG00000164107	HAND2
	ENSORLG00000027036	ENSG00000103485	QPRT
	ENSORLG00000027042
	ENSORLG00000027102	ENSG00000157005	SST
	ENSORLG00000027322	ENSG00000150627	WDR17
	ENSORLG00000027411
	ENSORLG00000027440
	ENSORLG00000027485	ENSG00000166073	GPR176
	ENSORLG00000027486	ENSG00000175182	FAM131A
	ENSORLG00000027538
	ENSORLG00000027625	ENSG00000198719	DLL1
	ENSORLG00000027690
	ENSORLG00000027750	ENSG00000115226	FNDC4
	ENSORLG00000027800	ENSG00000174721	FGFBP3
	ENSORLG00000027849	ENSG00000188613	NANOS1
	ENSORLG00000027966	ENSG00000130590	SAMD10
	ENSORLG00000027983	ENSG00000124827	GCM2
	ENSORLG00000028050
	ENSORLG00000028110
	ENSORLG00000028147	ENSG00000183914	DNAH2
	ENSORLG00000028181
	ENSORLG00000028187	ENSG00000166165	CKB
	ENSORLG00000028200	ENSG00000183914	DNAH2
	ENSORLG00000028296
	ENSORLG00000028327
	ENSORLG00000028335	ENSG00000163357	DCST1
	ENSORLG00000028407	ENSG00000060491	OGFR
	ENSORLG00000028468	ENSG00000165985	C1QL3
	ENSORLG00000028480
	ENSORLG00000028548
	ENSORLG00000028599	ENSG00000158113	LRRC43
	ENSORLG00000028619
	ENSORLG00000028642
	ENSORLG00000028799	ENSG00000143196	DPT
	ENSORLG00000028804	ENSG00000187902	SHISA7
	ENSORLG00000028805	ENSG00000174016	TENT5D
	ENSORLG00000028863
	ENSORLG00000028868
	ENSORLG00000028941	ENSG00000088881	EBF4
	ENSORLG00000029015	ENSG00000078618	NRDC
	ENSORLG00000029163
	ENSORLG00000029347	ENSG00000162631	NTNG1
	ENSORLG00000029425
	ENSORLG00000029451	ENSG00000172247	C1QTNF4
	ENSORLG00000029502	ENSG00000206069	TMEM211
	ENSORLG00000029504	ENSG00000133878	DUSP26
	ENSORLG00000029516	ENSG00000127578	WFIKKN1
	ENSORLG00000029519	ENSG00000163497	FEV
	ENSORLG00000029853	ENSG00000075290	WNT8B
	ENSORLG00000030037	ENSG00000250067	YJEFN3
	ENSORLG00000030073
	ENSORLG00000030096	ENSG00000177182	CLVS1
	ENSORLG00000030205
	ENSORLG00000030222
	ENSORLG00000030273
	ENSORLG00000030275
	ENSORLG00000030293
	ENSORLG00000030326	ENSG00000104804	TULP2
	ENSORLG00000030387	ENSG00000130700	GATA5
	ENSORLG00000030390
	ENSORLG00000030408
	ENSORLG00000030607
	ENSORLG00000030645	ENSG00000213689	TREX1
	ENSORLG00000030652	ENSG00000111241	FGF6

## Sheet: S4
	Table S4: Commonly regulated genes in both H:Ylat and H:Ycur XY hybrid females in comparison to XX both H:Ylat and H:Ycur ovaries.
	Upregulated genes ID	Human gene stable ID	Human gene name		Downregulated genes ID	Human gene stable ID	Human gene name
	ENSORLG00000009188	ENSG00000102053	ZC3H12B		ENSORLG00000006624	ENSG00000177984	LCN15
	ENSORLG00000011267				ENSORLG00000011970
	ENSORLG00000015111				ENSORLG00000010663	ENSG00000215704	CELA2B
	ENSORLG00000027236				ENSORLG00000011965
	ENSORLG00000029850	ENSG00000143515	ATP8B2

## Sheet: S5
	Table S5: Exclusively regulated genes in XY H:Ylat and in XY H:Ycur hybrid females in comparison to XX both H:Ylat and H:Ycur ovaries.
	Upregulated genes ID XY H:Ylat	Human gene stable ID	Human gene name		Upregulated genes ID XY H:Ycur	Human gene stable ID	Human gene name		Downregulated genes ID XY H:Ylat	Human gene stable ID	Human gene name		Downregulated genes ID XY H:Ycur	Human gene stable ID	Human gene name
	ENSORLG00000001800	ENSG00000137809	ITGA11		ENSORLG00000000054				ENSORLG00000000412	ENSG00000070915	SLC12A3		ENSORLG00000000197
	ENSORLG00000003211	ENSG00000131730	CKMT2		ENSORLG00000000055	ENSG00000187122	SLIT1		ENSORLG00000002898				ENSORLG00000001514	ENSG00000174326	SLC16A11
	ENSORLG00000003676				ENSORLG00000000217	ENSG00000125538	IL1B		ENSORLG00000002912				ENSORLG00000002346	ENSG00000131095	GFAP
	ENSORLG00000005326	ENSG00000196092	PAX5		ENSORLG00000000313	ENSG00000144214	LYG1		ENSORLG00000003791	ENSG00000172005	MAL		ENSORLG00000002824
	ENSORLG00000005626	ENSG00000118733	OLFM3		ENSORLG00000000502	ENSG00000171819	ANGPTL7		ENSORLG00000004586	ENSG00000142615	CELA2A		ENSORLG00000006624	ENSG00000107317	PTGDS
	ENSORLG00000006111	ENSG00000149927	DOC2A		ENSORLG00000000705				ENSORLG00000004947				ENSORLG00000008394	ENSG00000251692	PTX4
	ENSORLG00000006119	ENSG00000148935	GAS2		ENSORLG00000000835	ENSG00000163171	CDC42EP3		ENSORLG00000005129	ENSG00000131459	GFPT2		ENSORLG00000008881	ENSG00000120645	IQSEC3
	ENSORLG00000006943	ENSG00000070748	CHAT		ENSORLG00000001223				ENSORLG00000006079	ENSG00000149452	SLC22A8		ENSORLG00000010663
	ENSORLG00000008237	ENSG00000121207	LRAT		ENSORLG00000001406				ENSORLG00000006426	ENSG00000141086	CTRL		ENSORLG00000011965
	ENSORLG00000009126	ENSG00000119715	ESRRB		ENSORLG00000001501				ENSORLG00000006612				ENSORLG00000011970
	ENSORLG00000009194				ENSORLG00000002031				ENSORLG00000006624	ENSG00000107317	PTGDS		ENSORLG00000011980
	ENSORLG00000011576				ENSORLG00000002585				ENSORLG00000007185				ENSORLG00000015528	ENSG00000132026	RTBDN
	ENSORLG00000011891				ENSORLG00000002699	ENSG00000183853	KIRREL1		ENSORLG00000007677	ENSG00000086300	SNX10		ENSORLG00000019459	ENSG00000137204	SLC22A7
	ENSORLG00000011996	ENSG00000135373	EHF		ENSORLG00000003181	ENSG00000196408	NOXO1		ENSORLG00000009468	ENSG00000073756	PTGS2		ENSORLG00000025297	ENSG00000101439	CST3
	ENSORLG00000012011	ENSG00000177989	ODF3B		ENSORLG00000003566				ENSORLG00000009921				ENSORLG00000026345
	ENSORLG00000012118	ENSG00000132640	BTBD3		ENSORLG00000003726	ENSG00000133121	STARD13		ENSORLG00000010032	ENSG00000153002	CPB1		ENSORLG00000027875
	ENSORLG00000013016	ENSG00000185933	CALHM1		ENSORLG00000003915	ENSG00000148344	PTGES		ENSORLG00000010663				ENSORLG00000028194
	ENSORLG00000014042				ENSORLG00000004902				ENSORLG00000011965				ENSORLG00000029449	ENSG00000143340	FAM163A
	ENSORLG00000017005	ENSG00000146250	PRSS35		ENSORLG00000004967	ENSG00000089472	HEPH		ENSORLG00000011970				ENSORLG00000029591	ENSG00000101439	CST3
	ENSORLG00000018142				ENSORLG00000005096	ENSG00000163736	PPBP		ENSORLG00000012336				ENSORLG00000030451
	ENSORLG00000020817	ENSG00000137090	DMRT1		ENSORLG00000005792	ENSG00000139572	GPR84		ENSORLG00000013389
	ENSORLG00000021197	ENSG00000207933	MIR9-1		ENSORLG00000006152				ENSORLG00000013582	ENSG00000010438	PRSS3
	ENSORLG00000022102				ENSORLG00000006177				ENSORLG00000013920	ENSG00000172782	FADS6
	ENSORLG00000022515				ENSORLG00000006186	ENSG00000107537	PHYH		ENSORLG00000014439	ENSG00000170835	CEL
	ENSORLG00000023439				ENSORLG00000006315	ENSG00000105509	HAS1		ENSORLG00000014657
	ENSORLG00000023677				ENSORLG00000006340	ENSG00000100985	MMP9		ENSORLG00000015380
	ENSORLG00000023759				ENSORLG00000006611	ENSG00000148411	NACC2		ENSORLG00000017882
	ENSORLG00000023948				ENSORLG00000006725	ENSG00000161905	ALOX15		ENSORLG00000019499
	ENSORLG00000023952				ENSORLG00000006795	ENSG00000168209	DDIT4		ENSORLG00000020625
	ENSORLG00000024427				ENSORLG00000006800	ENSG00000006638	TBXA2R		ENSORLG00000021942
	ENSORLG00000024471				ENSORLG00000007689	ENSG00000035862	TIMP2		ENSORLG00000022336
	ENSORLG00000024585				ENSORLG00000007766				ENSORLG00000022831
	ENSORLG00000024752	ENSG00000126010	GRPR		ENSORLG00000008234	ENSG00000108342	CSF3		ENSORLG00000022909
	ENSORLG00000025309				ENSORLG00000008367	ENSG00000155066	PROM2		ENSORLG00000024147	ENSG00000183571	PGPEP1L
	ENSORLG00000025579				ENSORLG00000008484	ENSG00000127954	STEAP4		ENSORLG00000025188
	ENSORLG00000025982				ENSORLG00000008689	ENSG00000099998	GGT5		ENSORLG00000025743
	ENSORLG00000026063				ENSORLG00000008860	ENSG00000256870	SLC5A8		ENSORLG00000026175	ENSG00000185634	SHC4
	ENSORLG00000026220	ENSG00000162006	MSLNL						ENSORLG00000026599	ENSG00000095752	IL11
	ENSORLG00000027356	ENSG00000243238	IGKV2-30		ENSORLG00000009075				ENSORLG00000026790	ENSG00000198736	MSRB1
	ENSORLG00000027434								ENSORLG00000027214
	ENSORLG00000027793				ENSORLG00000009193				ENSORLG00000027446	ENSG00000112116	IL17F
	ENSORLG00000027893				ENSORLG00000009213	ENSG00000115594	IL1R1		ENSORLG00000029007
	ENSORLG00000028009	ENSG00000136213	CHST12		ENSORLG00000009311	ENSG00000174016	TENT5D		ENSORLG00000029636
	ENSORLG00000028292				ENSORLG00000009386				ENSORLG00000029961
	ENSORLG00000028502				ENSORLG00000009446	ENSG00000166482	MFAP4		ENSORLG00000030653
	ENSORLG00000028509	ENSG00000187942	LDLRAD2		ENSORLG00000009612
	ENSORLG00000028775				ENSORLG00000009863	ENSG00000173406	DAB1
	ENSORLG00000029160				ENSORLG00000009933	ENSG00000081181	ARG2
	ENSORLG00000029597				ENSORLG00000010025
	ENSORLG00000029820	ENSG00000254647	INS		ENSORLG00000010561	ENSG00000157193	LRP8
					ENSORLG00000010628
					ENSORLG00000011256	ENSG00000167434	CA4
					ENSORLG00000011362	ENSG00000120875	DUSP4
					ENSORLG00000011364	ENSG00000178695	KCTD12
					ENSORLG00000011457	ENSG00000131059	BPIFA3
					ENSORLG00000011531
					ENSORLG00000011596	ENSG00000145365	TIFA
					ENSORLG00000011912	ENSG00000170425	ADORA2B
					ENSORLG00000012085	ENSG00000197594	ENPP1
					ENSORLG00000012638	ENSG00000084674	APOB
					ENSORLG00000012675
					ENSORLG00000012895	ENSG00000160326	SLC2A6
					ENSORLG00000013340	ENSG00000197405	C5AR1
					ENSORLG00000013826
					ENSORLG00000013837
					ENSORLG00000013916
					ENSORLG00000013976
					ENSORLG00000013998	ENSG00000102468	HTR2A
					ENSORLG00000014162
					ENSORLG00000014572
					ENSORLG00000014843	ENSG00000039537	C6
					ENSORLG00000016084
					ENSORLG00000016512	ENSG00000012223	LTF
					ENSORLG00000016841
					ENSORLG00000016854
					ENSORLG00000017476	ENSG00000125910	S1PR4
					ENSORLG00000017639	ENSG00000187554	TLR5
					ENSORLG00000017937	ENSG00000185215	TNFAIP2
					ENSORLG00000018941	ENSG00000213903	LTB4R
					ENSORLG00000019168
					ENSORLG00000020553	ENSG00000196611	MMP1
					ENSORLG00000020577	ENSG00000115414	FN1
					ENSORLG00000020879	ENSG00000115541	HSPE1
					ENSORLG00000021823
					ENSORLG00000021942
					ENSORLG00000022248
					ENSORLG00000022275
					ENSORLG00000022422
					ENSORLG00000022890
					ENSORLG00000023372
					ENSORLG00000023498	ENSG00000105246	EBI3
					ENSORLG00000023527	ENSG00000169403	PTAFR
					ENSORLG00000023594
					ENSORLG00000023884
					ENSORLG00000023928	ENSG00000188820	CALHM6
					ENSORLG00000024012
					ENSORLG00000024117
					ENSORLG00000024452
					ENSORLG00000024488
					ENSORLG00000024520	ENSG00000126010	GRPR
					ENSORLG00000024643
					ENSORLG00000024744
					ENSORLG00000024879	ENSG00000145626	UGT3A1
					ENSORLG00000024944	ENSG00000169403	PTAFR
					ENSORLG00000024957	ENSG00000146678	IGFBP1
					ENSORLG00000026131
					ENSORLG00000026149	ENSG00000163661	PTX3
					ENSORLG00000026223
					ENSORLG00000026379
					ENSORLG00000026458
					ENSORLG00000026599	ENSG00000095752	IL11
					ENSORLG00000026629
					ENSORLG00000026783
					ENSORLG00000026924
					ENSORLG00000027052
					ENSORLG00000027088	ENSG00000183615	FAM167B
					ENSORLG00000027110	ENSG00000139899	CBLN3
					ENSORLG00000027155	ENSG00000076662	ICAM3
					ENSORLG00000027173	ENSG00000142677	IL22RA1
					ENSORLG00000027367	ENSG00000038427	VCAN
					ENSORLG00000027500
					ENSORLG00000027573	ENSG00000116016	EPAS1
					ENSORLG00000027610	ENSG00000139899	CBLN3
					ENSORLG00000027652
					ENSORLG00000027653
					ENSORLG00000027810	ENSG00000121053	EPX
					ENSORLG00000027865
					ENSORLG00000027946
					ENSORLG00000027981	ENSG00000130203	APOE
					ENSORLG00000028011
					ENSORLG00000028170	ENSG00000103023	PRSS54
					ENSORLG00000028244	ENSG00000163435	ELF3
					ENSORLG00000028273	ENSG00000102445	RUBCNL
					ENSORLG00000028291	ENSG00000174796	THAP6
					ENSORLG00000028442	ENSG00000126262	FFAR2
					ENSORLG00000028647	ENSG00000161642	ZNF385A
					ENSORLG00000028725
					ENSORLG00000028749
					ENSORLG00000028773	ENSG00000000005	TNMD
					ENSORLG00000028812
					ENSORLG00000028925	ENSG00000145723	GIN1
					ENSORLG00000028943	ENSG00000137077	CCL21
					ENSORLG00000029074
					ENSORLG00000029494	ENSG00000095752	IL11
					ENSORLG00000029526	ENSG00000197888	UGT2B17
					ENSORLG00000029542	ENSG00000162881	OXER1
					ENSORLG00000029844
					ENSORLG00000029914
					ENSORLG00000029989
					ENSORLG00000030011	ENSG00000137558	PI15
					ENSORLG00000030122
					ENSORLG00000030151	ENSG00000102794	ACOD1
					ENSORLG00000030212	ENSG00000251692	PTX4
					ENSORLG00000030330
					ENSORLG00000030376
					ENSORLG00000030430
					ENSORLG00000030465
					ENSORLG00000030575
